# Supplementary material
Source: PubMed Central journal article supplement (PMC6445016)
Supplement: micronano201718-s1.pdf [file micronano201718-s1.pdf]

## Supplementary file

# Measurement of copy number variation in single cancer cells using rapid-emulsification digital droplet MDA

Samuel C. Kim<sup>1,\*</sup>, Gayatri Premasekharan<sup>2,\*</sup>, Iain C. Clark<sup>1</sup>, Hawi B. Gemeda<sup>1</sup>, Pamela L. Paris<sup>2</sup> and Adam R. Abate<sup>1</sup>

*Microsystems & Nanoengineering* (2017) **3**, 17018; doi:10.1038/micronano.2017.18; Published online: 19 June 2017

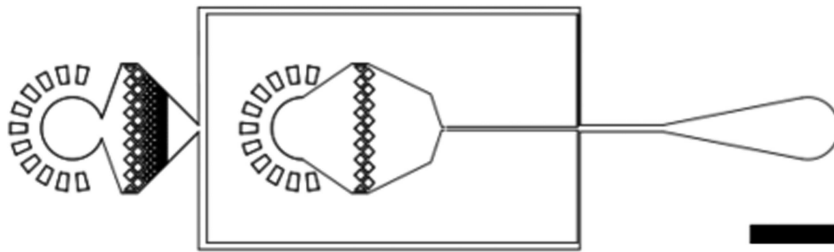

**Figure S1** Flow focus device used for suction-pull method (scale bar: 1 mm). Nozzle size is 50  $\mu\text{m}$  ( $H$ )  $\times$  80  $\mu\text{m}$  ( $W$ ). The CAD file is also provided as Supplementary Data (re-ddMDA\_device.dwg).

**Table S1** Academic and commercial microfluidics foundries

| Name                                      | Web                                                                                                                             |
|-------------------------------------------|---------------------------------------------------------------------------------------------------------------------------------|
| Achira Labs (India)                       | <a href="http://www.achiralabs.com/microfluidic-chip-fabrication/">http://www.achiralabs.com/microfluidic-chip-fabrication/</a> |
| CiDRA Precision Services (USA)            | <a href="http://www.cidraprecisionservices.com/">http://www.cidraprecisionservices.com/</a>                                     |
| Elveflow (France)                         | <a href="http://www.elveflow.com/">http://www.elveflow.com/</a>                                                                 |
| FlowJEM (Canada)                          | <a href="http://www.flowjem.com/">http://www.flowjem.com/</a>                                                                   |
| Kavli Nanoscience Institute (USA)         | <a href="http://www.kni.caltech.edu/facilities/">http://www.kni.caltech.edu/facilities/</a>                                     |
| SIMTech Microfluidics Foundry (Singapore) | <a href="http://www1.simtech.a-star.edu.sg/smf/">http://www1.simtech.a-star.edu.sg/smf/</a>                                     |
| uFluidix (USA)                            | <a href="http://ufluidix.com/">http://ufluidix.com/</a>                                                                         |

**Table S2** Correlation coefficients between CNV data obtained from different methods

|                | aCGH | ddMDA-50cell | ddMDA-1cell | re-ddMDA-1cell | vortex-MDA-1cell |
|----------------|------|--------------|-------------|----------------|------------------|
| aCGH           | 1    | 0.669        | 0.662       | 0.524          | 0.314            |
| ddMDA-50cell   |      | 1            | 0.959       | 0.822          | 0.467            |
| ddMDA-1cell    |      |              | 1           | 0.829          | 0.478            |
| re-ddMDA-1cell |      |              |             | 1              | 0.432            |

2.5 Mb binned log ratios were used to compute correlation coefficient.

**Table S3** Correlation coefficients between CNV data obtained from different methods

|                | aCGH | ddMDA-50cell | ddMDA-1cell | re-ddMDA-1cell | vortex-MDA-1cell |
|----------------|------|--------------|-------------|----------------|------------------|
| aCGH           | 1    | 0.635        | 0.609       | 0.450          | 0.167            |
| ddMDA-50cell   |      | 1            | 0.877       | 0.693          | 0.202            |
| ddMDA-1cell    |      |              | 1           | 0.674          | 0.190            |
| re-ddMDA-1cell |      |              |             | 1              | 0.154            |

500 kb binned log ratios were used to compute correlation coefficient.

<sup>1</sup>Department of Bioengineering and Therapeutic Sciences, University of California, San Francisco (UCSF), California Institute for Quantitative Biosciences (QB3) San Francisco, San Francisco, CA 94158, USA and <sup>2</sup>Department of Urology, Division of Hematology & Oncology, University of California, San Francisco (UCSF), San Francisco, CA 94158, USA. Correspondence: Adam R. Abate (adam@abatelab.org)

\*These authors contributed equally to this work.

**Table S4** Correlation coefficients between CNV data obtained from different methods

|                | aCGH | ddMDA-50cell | ddMDA-1cell | re-ddMDA-1cell | vortex-MDA-1cell |
|----------------|------|--------------|-------------|----------------|------------------|
| aCGH           | 1    | 0.557        | 0.460       | 0.327          | 0.127            |
| ddMDA-50cell   |      | 1            | 0.609       | 0.476          | 0.110            |
| ddMDA-1cell    |      |              | 1           | 0.398          | 0.077            |
| re-ddMDA-1cell |      |              |             | 1              | 0.076            |

100 kb binned log ratios were used to compute correlation coefficient.
